# Supplementary figures and images for: A Novel Strategy for Rapid Fluorescence Detection of FluB and SARS-CoV-2
Source: MDPI journal article supplement (doi:10.3390/molecules28052104), 2023-02-23

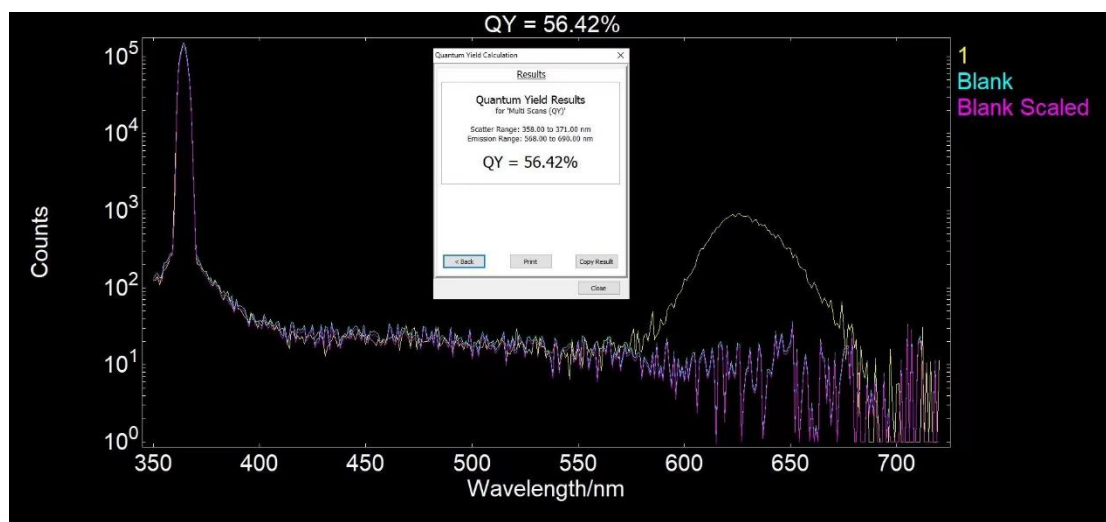

**Figure S1.** The quantum yield result of the QDFM

Supplement: s1 [file s1]
